# Supplementary material for: Evidence From Web-Based Dietary Search Patterns to the Role of B12 Deficiency in Non-Specific Chronic Pain: A Large-Scale Observational Study
Source: PubMed Central journal article supplement (PMC5775484; doi:10.2196/jmir.8667), 2018-01-05
Supplement: jmir_v20i1e4_app4.pdf [file jmir_v20i1e4_app4.pdf]

Multimedia Appendix 4: Table 2 with regression coefficients for statistically significant interactions

|                   | R <sup>2</sup> I | CoB12  | Beef   | Chicken | Egg    | Mackerel | Milk   | Pig    | Salmon | Shellfish | Trout  | Tuna   | Turkey | Tomato |
|-------------------|------------------|--------|--------|---------|--------|----------|--------|--------|--------|-----------|--------|--------|--------|--------|
| <b>gabapentin</b> | 3.39E-03         | -0.219 | -0.007 | -0.006  | -0.013 | -0.003   | -0.006 | -0.010 | -0.010 | -0.015    | -0.007 | -0.013 | -0.001 | 0.000  |
| <b>tramadol</b>   | 3.35E-03         | -0.207 | -0.008 | -0.007  | -0.013 | -0.003   | -0.007 | -0.012 | -0.014 | -0.016    | -0.007 | -0.015 | -0.001 | 0.000  |
| <b>neuropathy</b> | 2.47E-03         | -0.228 | -0.007 | -0.006  | -0.011 | -0.003   | -0.006 | -0.010 | -0.009 | -0.015    | -0.007 | -0.013 | -0.001 | 0.000  |
| <b>lyrica</b>     | 2.28E-03         | -0.113 | -0.004 | -0.004  | -0.007 | -0.002   | -0.004 | -0.007 | -0.006 | -0.009    | -0.004 | -0.008 | -0.001 |        |
| <b>omeprazole</b> | 2.26E-03         | -0.136 | -0.004 | -0.003  | -0.007 | -0.002   | -0.003 | -0.006 | -0.005 | -0.008    | -0.003 | -0.007 | 0.000  |        |
| <b>sertraline</b> | 2.10E-03         | -0.164 | -0.003 | -0.003  | -0.005 | -0.001   | -0.003 | -0.004 | -0.003 | -0.006    | -0.002 | -0.005 | 0.000  |        |
| <b>citalopram</b> | 1.96E-03         | -0.235 | -0.003 | -0.002  | -0.004 | -0.001   | -0.002 | -0.004 | -0.003 | -0.006    | -0.002 | -0.005 | 0.000  | 0.000  |
| <b>oxycodone</b>  | 1.81E-03         | -0.157 | -0.005 | -0.005  | -0.009 | -0.002   | -0.004 | -0.008 | -0.006 | -0.011    | -0.004 | -0.010 | -0.001 |        |
| <b>duloxetine</b> | 1.78E-03         | -0.214 | -0.002 | -0.002  | -0.004 | -0.001   | -0.002 | -0.003 | -0.003 | -0.004    | -0.002 | -0.004 | 0.000  | 0.000  |
| <b>trazodone</b>  | 1.77E-03         | -0.182 | -0.003 | -0.003  | -0.005 | -0.001   | -0.003 | -0.005 | -0.005 | -0.007    | -0.003 | -0.006 | 0.000  |        |
